# Supplementary material
Source: Springer Nature journal article supplement (https://www.springermedizin.de/resource/supplementary/12889_2012_6091_MOESM2_ESM.pdf/9494202)

ICER

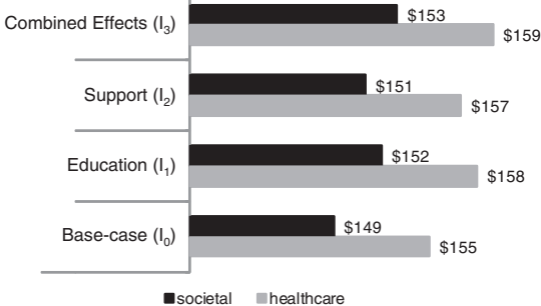

Supplement: MOESM2 [file 9494202]
